# Supplementary material
Source: PubMed Central journal article supplement (PMC9675030)
Supplement: mmc1.pdf [file mmc1.pdf]

**Biophysical Journal, Volume 121**

**Supplemental information**

**Effects of vimentin on the migration, search efficiency, and mechanical resilience of dendritic cells**

**M. Reza Shaebani, Luiza Stankevicins, Doriane Vesperini, Marta Urbanska, Daniel A.D. Flormann, Emmanuel Terriac, Annica K.B. Gad, Fang Cheng, John E. Eriksson, and Franziska Lautenschläger**

# Supplementary Information to Effects of Vimentin on the Migration, Search Efficiency, and Mechanical Resilience of Dendritic Cells

M. Reza Shaebani, Luiza Stankevics, Doriane Vesperini, Marta Urbanska, Daniel A. D. Flormann, Emmanuel Terriac, Annica K. B. Gad, Fang Cheng, John E. Eriksson, Franziska Lautenschläger

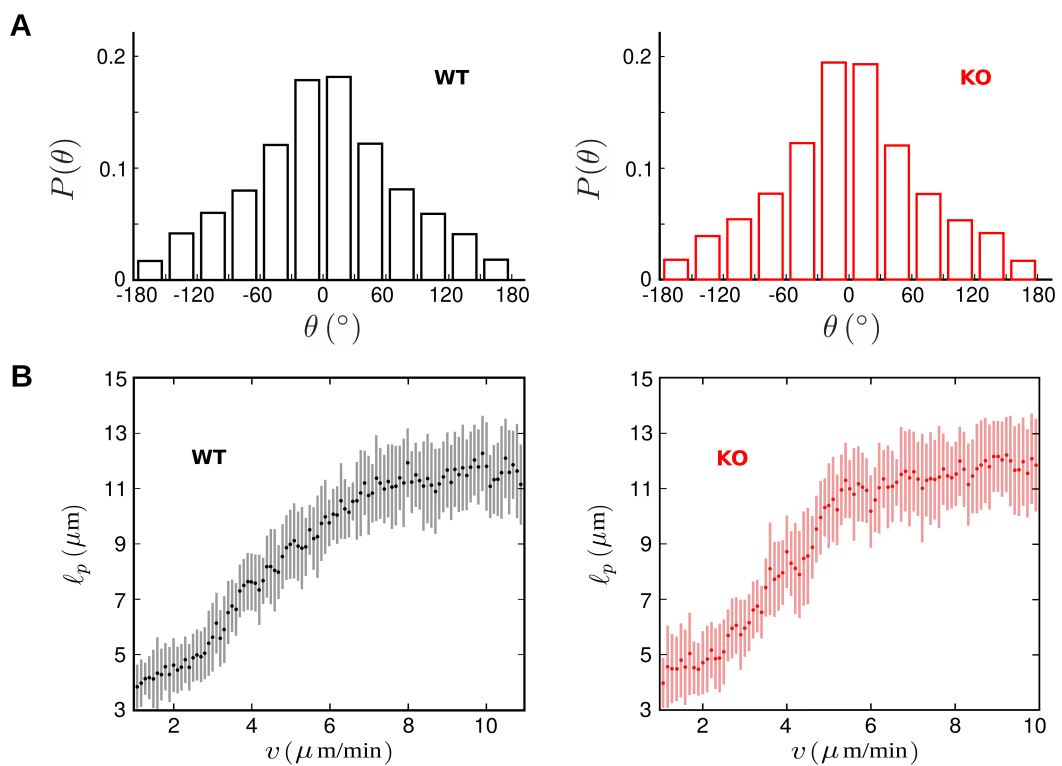

**Figure S1: Comparison between the kinematics of bone-marrow-derived dendritic cells (BMDCs) with (WT) or without (KO) vimentin in two dimensions.** (A) Probability distribution  $P(\theta)$  of the turning angle  $\theta$  at each recorded position of WT (left) and KO (right) BMDCs. (B) Local persistence length  $\ell_p$  versus the migration speed  $v$  of WT and KO BMDCs.  $\ell_p$  is deduced from  $p = \cos(\theta) = e^{-\ell/\ell_p}$ , with  $\ell$  being the distance between two successive recorded positions [56]. The speed binning intervals of  $0.1 \mu\text{m}/\text{min}$  are used.

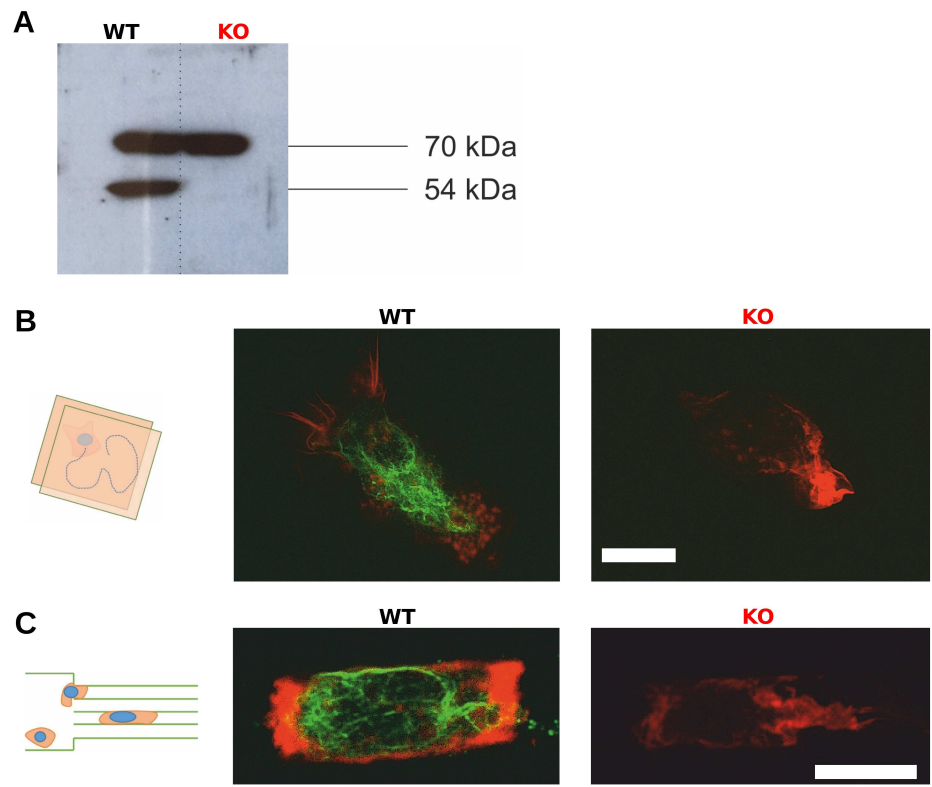

**Figure S2: Cytoskeletal characterization in cells with (WT) or without (KO) vimentin.** (A) Representative Western blot for protein quantification of vimentin in WT and KO primary BMDCs (54 kDa, vimentin), with loading control Hsc70 (70 kDa). (B,C) Representative images of WT and KO BMDCs for actin (red) and vimentin (green) filaments in 2D (B) and 1D (C) experiments. Scale bars, 10  $\mu\text{m}$ .

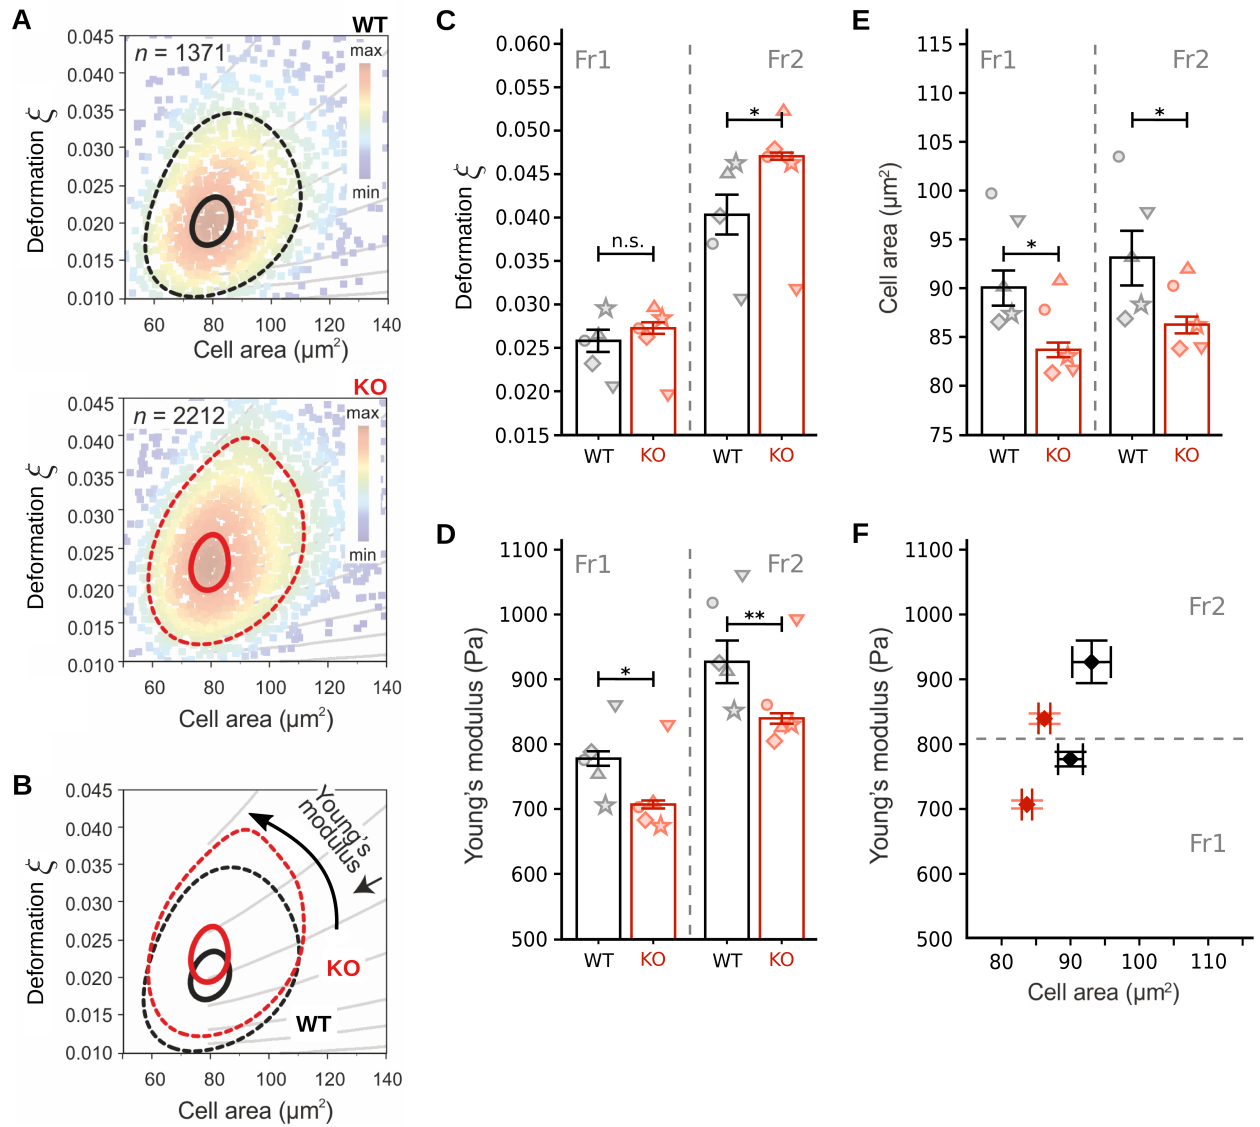

**Figure S3: Real-time deformability cytometry analysis of global mechanical properties of BMDCs with (WT) or without (KO) vimentin.** (A) Deformation-cell area scatter plots, showing a representative measurements of WT and KO BMDCs. The color map represents the event density and the contour plots delineate 50% density (dashed lines) and 95% density (solid lines).  $n$  is the number of measured cells. (B) Overlay of contours from (A). Grey lines are isoelastic regions from numerical simulations, which group cells of same mechanical properties. (C-E) Comparison of dimensionless deformation  $\xi$  (C), Young's modulus (D), and cell area (E) of WT and KO BMDCs, measured at two different flow rates: Fr1 ( $0.16 \mu\text{L}\cdot\text{s}^{-1}$ ) and Fr2 ( $0.32 \mu\text{L}\cdot\text{s}^{-1}$ ). The data represent median  $\pm$  median absolute deviation. Circles denote the median values of five independent experiments. Statistical analysis is performed using linear mixed effects model. \* $p < 0.05$ ; \*\* $p < 0.01$ ; n.s., not significant. (F) Young's modulus versus cell area at two different flow rates.

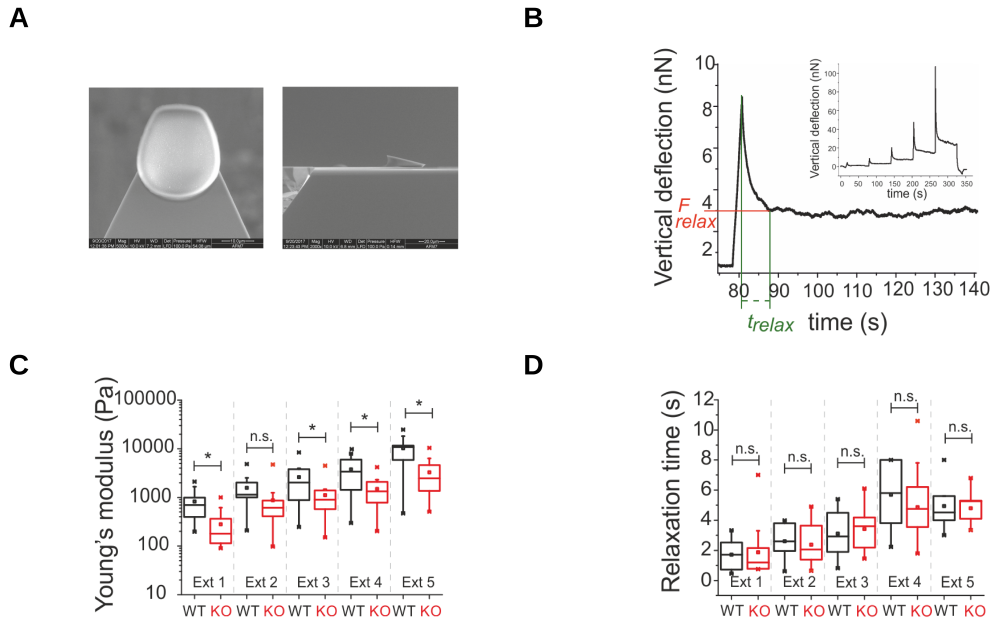

**Figure S4: Force-mode atomic force microscopy analysis of dendritic cell mechanics.** (A) Representative ventral and lateral electron microscopy images of wedged cantilevers used to evaluate the cell global mechanical response by atomic force microscopy. (B) Scheme of deformation graph used for analysis, showing measurement of relaxation time with atomic force microscopy. (C,D) Young's modulus (C) and relaxation time (D) of WT (black) and KO (red) BMDCs measured at different extents. Box plots for three independent experiments (total number of cells: 12 WT and 16 KO BMDCs) represent 25<sup>th</sup> to 75<sup>th</sup> percentile range with a line at the median and a square at the mean. Whiskers indicate extreme data points within 1.5× interquartile range (IQR). \* $p < 0.05$ ; n.s., not significant ( $t$  test).

**Table S1.** Comparison between the *in vitro* amoeboid migration of BMDCs with (WT) or without (KO) vimentin. The *apparent persistence* is a dimensionless quantity defined as the end-to-end distance divided by the actual length of the cell trajectory.

| system | observable                                            | cell type | mean $\pm$ standard error |
|--------|-------------------------------------------------------|-----------|---------------------------|
| 1D     | percentage of migrating cells                         | WT        | 72.2 $\pm$ 2.4 %          |
|        |                                                       | KO        | 57.8 $\pm$ 5.3 %          |
|        | migration speed ( $\mu\text{m}\cdot\text{min}^{-1}$ ) | WT        | 5.55 $\pm$ 0.09           |
|        |                                                       | KO        | 4.98 $\pm$ 0.12           |
|        | apparent persistence                                  | WT        | 0.680 $\pm$ 0.007         |
|        |                                                       | KO        | 0.660 $\pm$ 0.010         |
| 2D     | percentage of migrating cells                         | WT        | 52.7 $\pm$ 9.1 %          |
|        |                                                       | KO        | 42.0 $\pm$ 10.1 %         |
|        | migration speed ( $\mu\text{m}\cdot\text{min}^{-1}$ ) | WT        | 5.53 $\pm$ 0.05           |
|        |                                                       | KO        | 4.53 $\pm$ 0.05           |
|        | path length ( $\mu\text{m}$ )                         | WT        | 383 $\pm$ 24              |
|        |                                                       | KO        | 240 $\pm$ 19              |
|        | apparent persistence                                  | WT        | 0.510 $\pm$ 0.004         |
|        |                                                       | KO        | 0.510 $\pm$ 0.004         |
|        | local persistence                                     | WT        | 0.44 $\pm$ 0.02           |
|        |                                                       | KO        | 0.47 $\pm$ 0.02           |

**Table S2.** Mechanical properties of BMDCs with (WT) or without (KO) vimentin as analysed by real-time deformability cytometry. The experiments were repeated five times for each condition. The data in the right three columns represent median  $\pm$  median absolute deviation.

| flow rate<br>( $\mu\text{L}\cdot\text{s}^{-1}$ ) | cell<br>type | number of cells<br>per experiment | total number<br>of cells | dimensionless<br>deformation $\xi$ | Young's<br>modulus (Pa) | cell area<br>( $\mu\text{m}^2$ ) |
|--------------------------------------------------|--------------|-----------------------------------|--------------------------|------------------------------------|-------------------------|----------------------------------|
| 0.16 [Fr1]                                       | WT           | 3069                              | 10238                    | $0.0256 \pm 0.0025$                | $776 \pm 22$            | $90.1 \pm 3.6$                   |
|                                                  |              | 2690                              |                          |                                    |                         |                                  |
|                                                  |              | 1371                              |                          |                                    |                         |                                  |
|                                                  |              | 1614                              |                          |                                    |                         |                                  |
|                                                  |              | 1494                              |                          |                                    |                         |                                  |
|                                                  | KO           | 1929                              | 9494                     | $0.0271 \pm 0.0012$                | $706 \pm 12$            | $82.9 \pm 1.2$                   |
|                                                  |              | 1991                              |                          |                                    |                         |                                  |
|                                                  |              | 2212                              |                          |                                    |                         |                                  |
|                                                  |              | 1836                              |                          |                                    |                         |                                  |
|                                                  |              | 1526                              |                          |                                    |                         |                                  |
| 0.32 [Fr2]                                       | WT           | 1652                              | 9093                     | $0.0403 \pm 0.0046$                | $926 \pm 66$            | $93.1 \pm 5.7$                   |
|                                                  |              | 2550                              |                          |                                    |                         |                                  |
|                                                  |              | 1055                              |                          |                                    |                         |                                  |
|                                                  |              | 1783                              |                          |                                    |                         |                                  |
|                                                  |              | 2053                              |                          |                                    |                         |                                  |
|                                                  | KO           | 2134                              | 10621                    | $0.0469 \pm 0.0008$                | $838 \pm 16$            | $86.2 \pm 1.8$                   |
|                                                  |              | 2218                              |                          |                                    |                         |                                  |
|                                                  |              | 2512                              |                          |                                    |                         |                                  |
|                                                  |              | 1971                              |                          |                                    |                         |                                  |
|                                                  |              | 1786                              |                          |                                    |                         |                                  |

**Table S3. Mechanical properties of BMDCs with (WT) or without (KO) vimentin as analysed by atomic force microscopy.** The mean value and the standard deviation of the relaxation time and the Young's modulus are shown.

| extent | cell type | Young's modulus measurement |                      | relaxation time measurement |                     |
|--------|-----------|-----------------------------|----------------------|-----------------------------|---------------------|
|        |           | number of cells             | Young's modulus (Pa) | number of cells             | relaxation time (s) |
| 1      | WT        | 12                          | 826 ± 575            | 8                           | 1.7 ± 1.1           |
|        | KO        | 16                          | 280 ± 248            | 13                          | 1.9 ± 1.8           |
| 2      | WT        | 12                          | 1573 ± 1221          | 7                           | 2.6 ± 1.2           |
|        | KO        | 16                          | 878 ± 1073           | 14                          | 2.4 ± 1.3           |
| 3      | WT        | 11                          | 2617 ± 2295          | 8                           | 3.1 ± 1.6           |
|        | KO        | 16                          | 1118 ± 993           | 17                          | 3.4 ± 1.5           |
| 4      | WT        | 10                          | 3782 ± 2731          | 7                           | 5.7 ± 2.3           |
|        | KO        | 16                          | 1491 ± 991           | 17                          | 4.9 ± 2.4           |
| 5      | WT        | 9                           | 10275 ± 7669         | 6                           | 4.9 ± 1.7           |
|        | KO        | 16                          | 3288 ± 2583          | 17                          | 4.8 ± 1.0           |
